# Supplementary material for: HLA-A2 Promotes the Therapeutic Effect of Umbilical Cord Blood-Derived Mesenchymal Stem Cells in Hyperoxic Lung Injury
Source: MDPI journal article supplement (doi:10.3390/bioengineering9040177), 2022-04-18
Supplement: s1 [file s1]

## Supplementary Materials:

|   |        |       |       |       |       |       |       |                |       |       |       |       |
|---|--------|-------|-------|-------|-------|-------|-------|----------------|-------|-------|-------|-------|
|   | 1      | 2     | 3     | 4     | 5     | 6     | 7     | 8              | 9     | 10    | 11    | 12    |
| A | Buffer | CD1a  | CD1b  | CD1d  | CD2   | CD3   | CD4   | CD4v4          | CD5   | CD6   | CD7   | CD8a  |
| B | CD8b   | CD9   | CD10  | CD11a | CD11b | CD11c | CD13  | CD14           | CD15  | CD15a | CD16  | CD18  |
| C | CD19   | CD20  | CD21  | CD22  | CD23  | CD24  | CD25  | CD26           | CD27  | CD28  | CD29  | CD30  |
| D | CD31   | CD32  | CD33  | CD34  | CD35  | CD36  | CD37  | CD38           | CD39  | CD40  | CD41a | CD41b |
| E | CD42a  | CD42b | CD43  | CD44  | CD45  | CD48a | CD48b | CD48c          | CD46  | CD47  | CD48  | CD49a |
| F | CD49b  | CD49c | CD49d | CD49e | CD50  | CD58a | CD53  | CD54           | CD55  | CD56  | CD57  | CD58  |
| G | CD59   | CD61  | CD62e | CD62L | CD62P | CD63  | CD64  | CD66 (A.C.6.4) | CD69a | CD69  | CD69  | CD70  |
| H | CD71   | CD72  | CD73  | CD74  | CD75  | CD77  | CD78  | CD80           | CD81  | CD83  | CD84  | CD85  |

|   |        |               |        |       |       |        |                |        |        |        |       |       |
|---|--------|---------------|--------|-------|-------|--------|----------------|--------|--------|--------|-------|-------|
|   | 1      | 2             | 3      | 4     | 5     | 6      | 7              | 8      | 9      | 10     | 11    | 12    |
| A | Buffer | CD86          | CD87   | CD88  | CD89  | CD90   | CD91           | CDw93  | CD94   | CD95   | CD97  | CD98  |
| B | CD99   | CD99R         | CD100  | CD102 | CD103 | CD105  | CD106          | CD107a | CD107b | CD108  | CD109 | CD112 |
| C | CD114  | CD116         | CD117  | CD118 | CD119 | CD120a | CD121a         | CD121b | CD122  | CD123  | CD124 | CD126 |
| D | CD127  | CD128 (CD135) | CD130  | CD134 | CD135 | CD137  | CD137 (Ligand) | CD138  | CD140a | CD140b | CD141 | CD142 |
| E | CD144  | CD146         | CD147  | CD150 | CD151 | CD152  | CD153          | CD154  | CD158a | CD158b | CD161 | CD162 |
| F | CD163  | CD164         | CD165  | CD166 | CD171 | CD172a | CD177          | CD178  | CD180  | CD181  | CD183 | CD184 |
| G | CD193  | CD195         | CD196  | CD197 | CD200 | CD205  | CD206          | CD209  | CD220  | CD221  | CD226 | CD227 |
| H | CD229  | CD231         | CD235a | CD243 | CD244 | CD255  | CD268          | CD271  | CD273  | CD274  | CD275 | CD278 |

|   |                            |           |        |        |        |              |               |                 |         |        |             |             |
|---|----------------------------|-----------|--------|--------|--------|--------------|---------------|-----------------|---------|--------|-------------|-------------|
|   | 1                          | 2         | 3      | 4      | 5      | 6            | 7             | 8               | 9       | 10     | 11          | 12          |
| A | Buffer                     | CD275     | CD282  | CD305  | CD309  | CD314        | CD321         | CDw327          | CDw328  | CD329  | CD335       | CD336       |
| B | CD337                      | CD338     | CD340  | cd3TCR | IL20RA | BLTR-1       | CLIP          | CMRF-44         | CMRF-56 | EGF-R  | MLP-R       | γδTCR       |
| C | Herp<br>Progenitor<br>Cell | HLA-A,B,C | HLA-A2 | HLA-DQ | HLA-DR | HLA-DR DP DQ | Invariant NKT | CD28 (p135-137) | MIC A/B | NKG1   | SSEA-1      | SSEA-4      |
| D | TRA-1-80                   | TRA-1-81  | V823   | V88    | CD132a | Buffer       | Buffer        | Buffer          | Buffer  | Buffer | Buffer      | Buffer      |
| E | migM                       | migG1     | migG2a | migG2b | migG3  | Buffer       | Buffer        | Buffer          | Buffer  | Buffer | Buffer      | Buffer      |
| F | CD49f                      | CD164     | CD126  | CD133  | CD201  | CD210        | CD212         | CD267           | CD294   | SSEA-3 | CD133 (ref) | CD133 (ref) |
| G | igM                        | igG1      | igG2a  | igG2b  | Buffer | Buffer       | Buffer        | Buffer          | Buffer  | Buffer | Buffer      | Buffer      |
| H | Buffer                     | Buffer    | Buffer | Buffer | Buffer | Buffer       | Buffer        | Buffer          | Buffer  | Buffer | Buffer      | Buffer      |

**Figure S1.** Cell surface antibody screening with Lyoplates. Lyophilized antibodies against 242 human cell surface markers are contained within the 96 well plates.

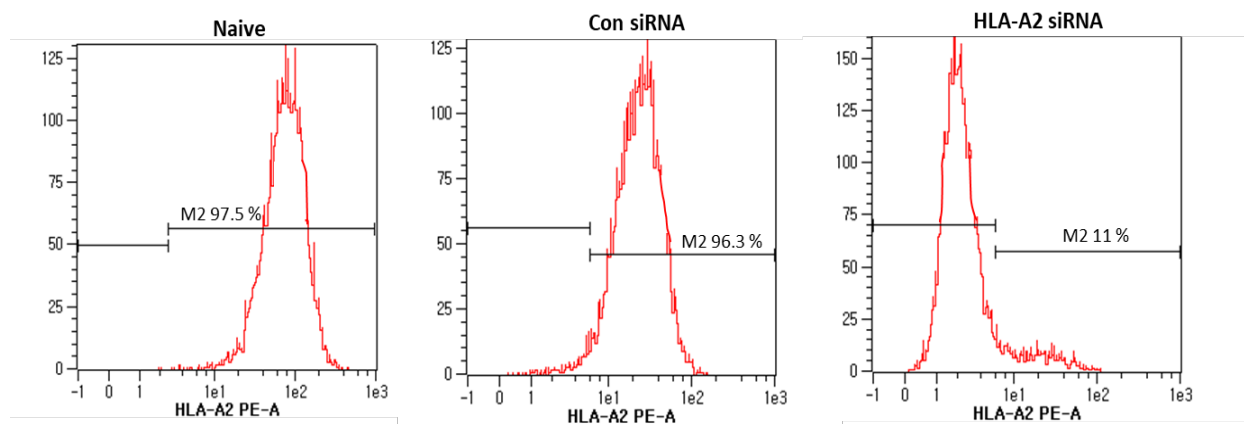

**Figure S2.** Silencing of HLA-A2 expression. UCB-MSCs were transfected with scramble siRNA (Con siRNAMSC) or HLA-A2 siRNA at P6 before injection in BPD model rats. Downregulated expression of HLA-A2 was confirmed via flow cytometry, confirming M2-related expression.

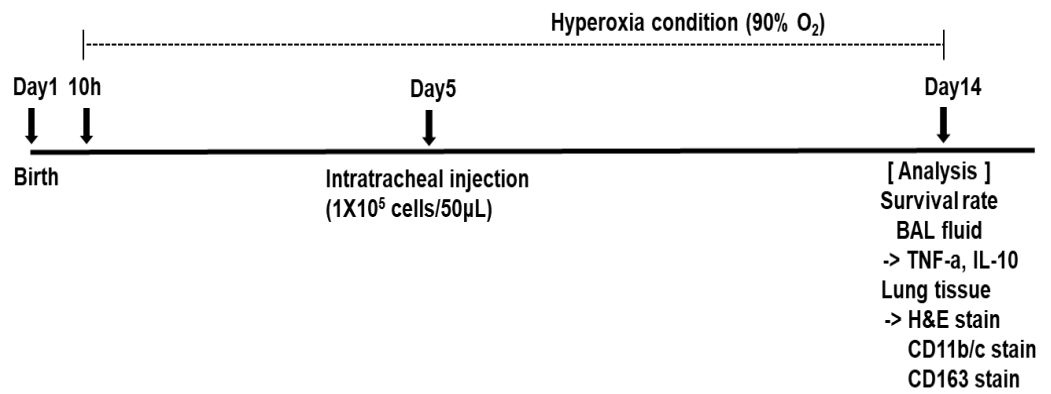

**Figure S3.** Experimental scheme of MSCs administration in the hyperoxic rat model.

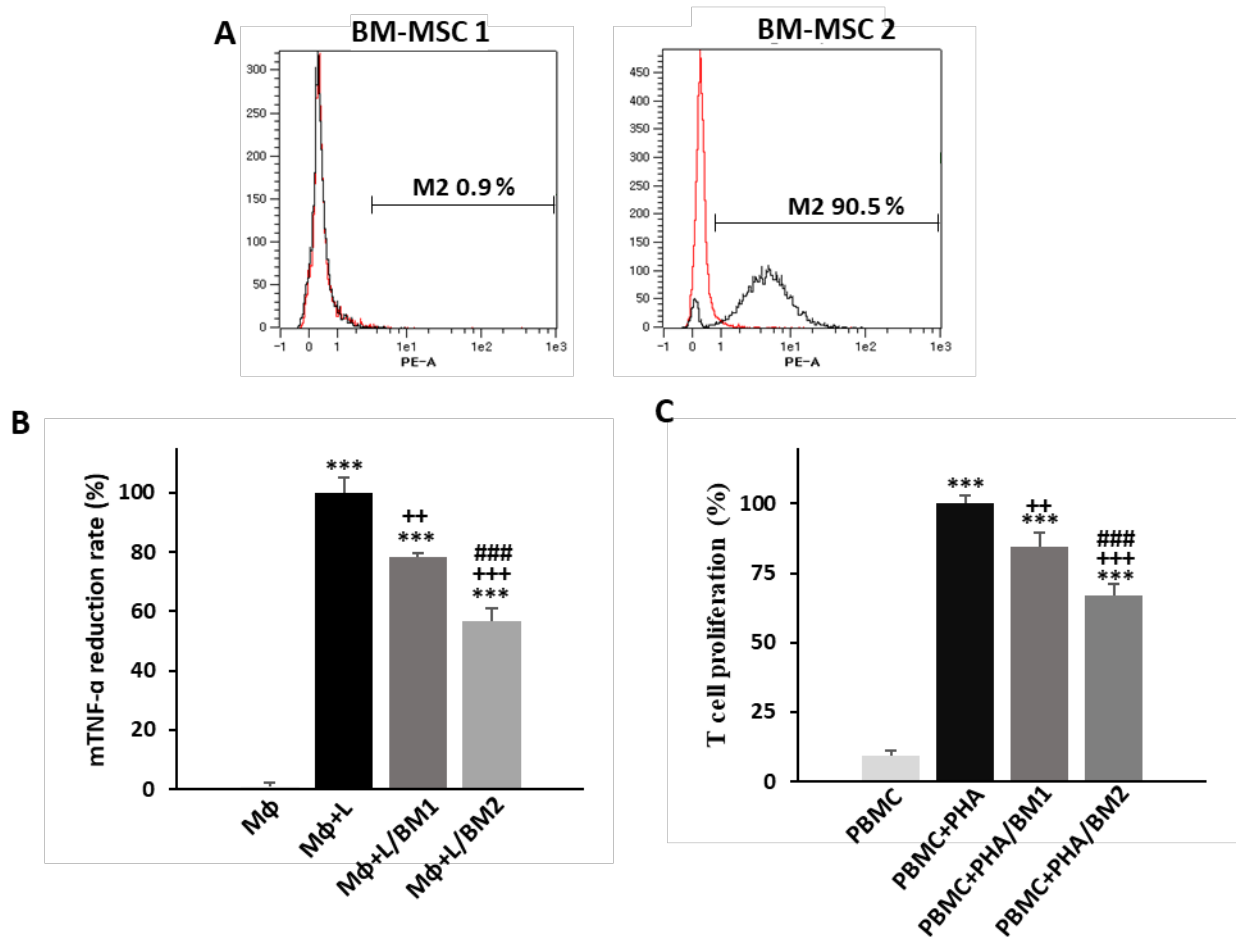

**Figure S4.** HLA-A2 expression in BM-MSCs from two different donors. (A) The protein expression levels of HLA-A2 were analyzed via flow cytometry. HLA-A2 expression was higher in BM1 compared to BM2 MSCs. (B) Raw 264.7 cells were exposed to LPS and co-cultured with BM-MSCs (1 or 2) for 2 days. Cell supernatants were analyzed for mouse TNF- $\alpha$  via ELISA. All MSCs exhibited anti-inflammatory effects. Two BM-MSCs exhibited significant difference in TNF- $\alpha$  suppression. Error bars represent means  $\pm$  SD,  $n=5$  per group; \*\*\*  $p < 0.001$ , vs. M $\Phi$ , +++  $p < 0.001$ , ++  $p < 0.01$  vs. M $\Phi$ +L, ###  $p < 0.01$  vs. M $\Phi$ +L/BM1. (C) PBMCs were stimulated with PHA and were then co-cultured with MSCs for 3 days. The proliferation of T cells is shown as a percentage relative to the positive control (PBMC+PHA; set to 100%). All MSCs exhibited T cell-suppressive effects. Two groups showing significant differences in T cell proliferation. Error bars represent the means  $\pm$  SD,  $n=5$  per group; \*\*\*  $p < 0.001$ , vs. PBMC, +++  $p < 0.001$ , ++  $p < 0.01$  vs. PBMC+PHA, ###  $p < 0.01$  vs. PBMC+PHA /BM1. M $\Phi$ ; macrophage, L; LPS, PBMC; peripheral blood mononuclear cell, PHA; phytohemagglutinin.

**Table S1.** Basic information of UCB-MSCs.

| UCB-MSCs | <u>Surface marker</u> |          | Differentiation |
|----------|-----------------------|----------|-----------------|
|          | Positive              | Negative |                 |
| #1       | Pass                  | Pass     | Pass            |
| #2       | Pass                  | Pass     | Pass            |
| #3       | Pass                  | Pass     | Pass            |
| #4       | Pass                  | Pass     | Pass            |
| #5       | Pass                  | Pass     | Pass            |
| #6       | Pass                  | Pass     | Pass            |
| #7       | Pass                  | Pass     | Pass            |
| #8       | Pass                  | Pass     | Pass            |
| #9       | Pass                  | Pass     | Pass            |
| #10      | Pass                  | Pass     | Pass            |
| #11      | Pass                  | Pass     | Pass            |
| #12      | Pass                  | Pass     | Pass            |
| #13      | Pass                  | Pass     | Pass            |
| #14      | Pass                  | Pass     | Pass            |
| #15      | Pass                  | Pass     | Pass            |

UCBs were isolated from three independent donors (UCB #1–15). UCB-MSCs were characterized based on MSC surface marker expression and MSC differentiation potential (positive: CD73, CD90, CD105, and CD166  $\geq 80\%$ ; negative: CD14, CD45  $\leq 1.0\%$ ; differentiation: osteogenic, chondrogenic, adipogenic).

**Table S2.** Sequences of primers and siRNAs.

| <b>Construct</b>     | <b>Sequence (5'-3')</b> |
|----------------------|-------------------------|
| Scramble siRNA       | UGGUUUACAUGUCGACUAA     |
|                      | UGGUUUACAUGUUGUGUGA     |
|                      | UGGUUUACAUGUUUUCUGA     |
|                      | UGGUUUACAUGUUUCCUA      |
| <i>HLA-A2</i> siRNA  | GAUGCUGAACAGUGACAAA     |
|                      | CGGAAAGCUUGCCUCAAUC     |
|                      | UUACAGUGUUUCUGGCUUA     |
|                      | GCUGGCGGAUCCAAGCAA      |
| <i>HLA-A2</i> primer | ACUAAGAGUGGUCGAAGAA     |
|                      | GCACAGCAGCAGAUUCGAUU    |

**Table S3.** Groups for the *in vivo* experiment

| Group                 | Number | MSCs (cells)      | PBS volume (μL) |
|-----------------------|--------|-------------------|-----------------|
| Normal control        | 10     | -                 | 50              |
| Hyperoxic lung injury | 18     | -                 | 50              |
| BPD+naïve MSC         | 15     | 1×10 <sup>5</sup> | 50              |
| BPD+con siRNA MSC     | 15     | 1×10 <sup>5</sup> | 50              |
| BPD+HLA-A2 siRNA MSC  | 15     | 1×10 <sup>5</sup> | 50              |

**Table S4.** Surface marker expression among different stem cell populations

| Transfection    | CD14 | CD45 | HLA<br>DR | CD73 | CD90 | CD105 | CD166 |
|-----------------|------|------|-----------|------|------|-------|-------|
| Naive           | -    | -    | -         | +    | +    | +     | +     |
| Con siRNA       | -    | -    | -         | +    | +    | +     | +     |
| HLA-A2<br>siRNA | -    | -    | -         | +    | +    | +     | +     |

The cells were transfected under three conditions. Surface antigen expression was assessed via flow cytometry. Three condition cells were strongly positive for MSC-specific markers CD73, CD90, CD105, and CD166, while negative for CD14, CD45, and HLA-DR (+: more than 80%; -: less than 5%).
